# Supplementary material
Source: publisher figshare collection journal article supplement (https://acs.figshare.com/ndownloader/files/6908555)
Supplement: Supplementary file 1 [file 6908555]

## Supporting Information

### **Hypoxia-mimicking nanofibrous scaffolds promote endogenous bone regeneration**

Qingqing Yao <sup>a,b</sup>, Yangxi Liu <sup>a,b</sup>, Jianning Tao <sup>c</sup>, Keith M. Baumgarten <sup>d</sup>,  
Hongli Sun <sup>a,b, \*</sup>

<sup>a</sup> Department of Biomedical Engineering, University of South Dakota, Sioux Falls, SD  
57107, USA

<sup>b</sup> BioSNTR, Sioux Falls, SD 57107, USA

<sup>c</sup> Children's Health Research Center at Sanford Research, Sioux Falls, SD 57104,  
USA

<sup>d</sup> Orthopedic Institute, Sioux Falls, SD 57105, USA

Corresponding Author

\* Professor Hongli Sun, Ph.D.

Department of Biomedical Engineering

The University of South Dakota

4800 N. Career Ave, Suite 221, Sioux Falls, SD 57107

Phone: (+1) 605-275-7470; Fax: +1 605-782-3280; E-mail:

[Hongli.Sun@usd.edu](mailto:Hongli.Sun@usd.edu)

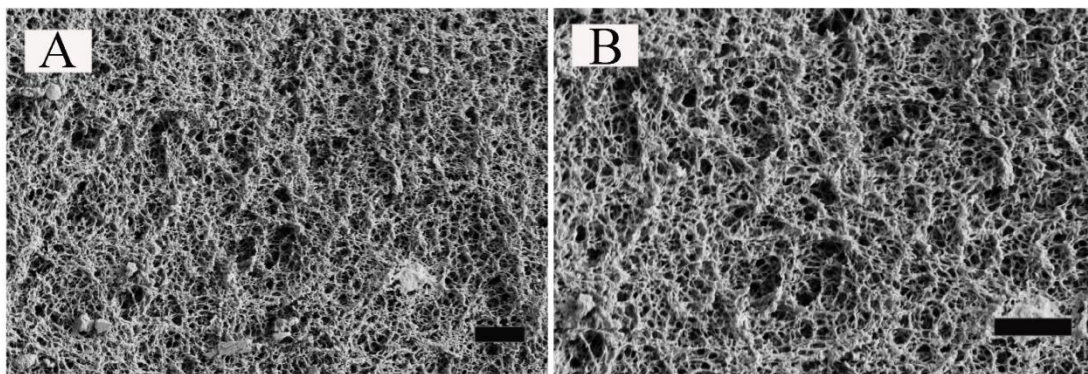

**Fig. S1: High magnification SEM images of gelatin nanofibers.** Morphology of gelatin nanofibers on 3D scaffolds was observed by SEM at 25,000X (A), and 40,000X (B), respectively. Scale bar =1  $\mu\text{m}$ .
